# Supplementary material
Source: publisher figshare collection journal article supplement (https://karger.figshare.com/ndownloader/files/14728520)
Supplement: Supplementary file 1 [file 14728520]

**Supplemental Table.**  Means and standard deviations of hearing thresholds with functional hearing for all observation periods.

| Frequency | Observation period | M | SD |
| --- | --- | --- | --- |
| 125 Hz | Preoperative | 16.25 | 6.08 |
|  | Activation | 20.00 | 8.79 |
|  | 6 month follow-up | 19.58 | 8.38 |
|  | 12 months follow-up | 22.92 | 8.91 |
|  | 36 months follow-up | 23.33 | 9.84 |
| 250 Hz | Preoperative | 8.33 | 5.77 |
|  | Activation | 15.42 | 10.33 |
|  | 6 month follow-up | 15.83 | 9.96 |
|  | 12 months follow-up | 16.25 | 9.56 |
|  | 36 months follow-up | 18.33 | 11.55 |
| 500 Hz | Preoperative | 10.42 | 6.2 |
|  | Activation | 21.25 | 11.31 |
|  | 6 month follow-up | 24.58 | 10.54 |
|  | 12 months follow-up | 26.67 | 10.73 |
|  | 36 months follow-up | 29.58 | 13.05 |
| 750 Hz | Preoperative | 14.79 | 4.45 |
|  | Activation | 26.67 | 11.84 |
|  | 6 month follow-up | 30 | 11.43 |
|  | 12 months follow-up | 33.75 | 11.41 |
|  | 36 months follow-up | 35.63 | 12.39 |
| 1000 Hz | Preoperative | 19.17 | 4.69 |
|  | Activation | 32.50 | 13.9 |
|  | 6 month follow-up | 35.83 | 13.11 |
|  | 12 months follow-up | 40.83 | 12.76 |
|  | 36 months follow-up | 44.17 | 14.59 |
| 1500 Hz | Preoperative | 29.17 | 3.59 |
|  | Activation | 44.58 | 15.29 |
|  | 6 month follow-up | 48.75 | 15.97 |
|  | 12 months follow-up | 54.58 | 16.16 |
|  | 36 months follow-up | 60.00 | 16.1 |
